# Supplementary material for: SQANTI: extensive characterization of long-read transcript sequences for quality control in full-length transcriptome identification and quantification
Source: Genome Res. 2018 Mar;28(3):396–411. doi: 10.1101/gr.222976.117 (PMC5848618; doi:10.1101/gr.222976.117)
Supplement: Supplemental Material [file supp_gr.222976.117_Supplemental_Tables.xlsx]

## Sheet: Supplemental  Table 1
SQANTI descriptors at transcript level
Column	Feature Name	Description	Use by RF classifier
1	isoform	Unique ID conferred by Pacbio to ToFU transcripts
2	chrom	Chromosome where the transcript aligns
3	strand	Strand to which the transcript belongs
4	length	Length of the transcript in nucleotides	X
5	exons	Number of exons	X
6	structural_category	Splice junction based classification of the transcript against a annotated reference transcriptome
7	associated_gene	Gene to which the transcript maps
8	associated_transcript	Transcript in the reference annotation which has the same splice pattern as the isoform. Only applicable to FSM, ISM and UTR3 Fragment transcripts.
9	ref_length	Length of the associated reference transcript in nts. Only applicable to FSM, ISM and UTR3 Fragment transcripts.
10	ref_exons	Number of exons of the associated reference transcript. Only applicable to FSM, ISM and UTR3 Fragment transcripts.
11	diff_to_TSS	Difference in nucleotides between the Transcription Start Site (TSS) of the associated reference transcript and the sequenced transcript. Only applicable to FSM, ISM and UTR3 Fragment transcripts.
12	diff_to_TTS	Difference in nucleotides between the Transcription Termination Site (TTS) of the associated reference transcript and the sequenced transcript. Only applicable to FSM, ISM and UTR3 Fragment transcripts.
13	subcategory	Type of subevent associated with the transcript. Applicable for ISM and novel transcripts.
14	RTS_stage	Detection of hallmarks of RT switching within at least one of the splice junctions of the sequenced transcript	X
15	all_canonical	Labelling of the type of splice junction in the transcript. If all the splice junctions of the transcript are canonical this field will be “canonical”. If there is at least one non canonical junction in the transcript will be labelled as non-canonical.
16	min_sample_cov	Lowest number of biological samples showing the presence of a splice junction within the transcript. Each time a splice junction within a transcript is covered by short reads of a different sample the value is augmented by 1. After mapping all available samples, the number of samples supporting each junction is computed and the minumun value of all transcript junctions is taken as min_sample_cov …	X
17	min_cov	Lowest number of short reads supporting the presence of a splice junction within the transcript. The number of short reads mapping to each splice junction are obtained for each available sample. After mapping all the available samples, the total number of short reads mapped per junction is computed and the lowest value is taken as minCov value	X
18	min_cov_pos	Position in nts relative to the TSS of the splice junction with the minCov value. If two splice junctions show the same minCov, the minCovPos selected is the one closest to the TSS.	X
19	sd_cov	Standard Deviation of the splice junction short read coverage per transcript	X
20	FL	Number of Full Length reads per transcript	X
21	n_indels	Number of indels in the ToFU transcript before genome-based correction	X
22	n_indels_junc	Number of junctions with indels around the splice junction of the ToFU transcript before correction	X
23	bite	The transcript has at least one junction labelled as bite	X
24	iso_exp	Expression of the transcript in TPMs calculated by short reads	X
25	gene_exp	Sum of all isoExp values of transcripts belonging to the same gene.	X
26	ratio_exp	Ratio between the isoExp and the geneExp	X
27	FSM_class	This feature classifies the transcript according to the expression of other isoforms in the gene to which the transcript belongs. Transcripts belonging to genes that only express one isoform are classified as A. Transcripts belonging to genes that express more than one isoform but none is a FSM are classified as B. Transcripts belonging to genes which express more than one isoform and other isofo…	X
28	coding	Logical indicating if the transcript is predicted to have an ORF by GMST	X
29	ORF_length	Length in aminoacids of the Open RF predicted by GMST
30	CDS_length	Length in nts of the CDS predicted by GMST
31	CDS_start	Position in nucleotides relative to the TSS of the start codon
32	CDS_end	Position in nucleotides relative to the TSS of the stop codon
33	perc_A_downstream_TTS	Percentage of adenines in a window of genomic DNA inmmediately downstream the TTS. The deffault parameter for window size is 20 nucleotides

## Sheet: Supplemental  Table 2
SQANTI decriptors at junction level
Column	Feature Name	Description
1	isoform	Unique ID conferred by Pacbio to ToFU transcripts.
2	chrom	Chromosome where the transcript aligns
3	strand	Strand to which the transcript belongs
4	junction_number	Position order, starting from the 5' end, of the junction in the transcript
5	genomic_start_coord	Start coordinate position of the junction in the genome
6	genomic_end_coord	End coordinate position of the junction in the genome
7	transcript_coord	Coordinate of the junction inside the transcript
8	junction_category	Type of junction. "Known" if both the acceptor and the donor sites are annotated in the provided reference annotation file and "Novel" otherwise.
9	start_site_category	"Known" or "novel" according to reference annotated splice sites
10	end_site_category	"Known" or "novel" according to reference annotated splice sites
11	diff_to_Ref_start_site	Nearest annotated splice site in the genome
12	diff_to_Ref_end_site	Nearest annotated splice site in the genome
13	bite_junction	Applies only to novel splice junctions. If the novel intron partially overlaps annotated exons the bite value is TRUE, otherwise it is FALSE.
14	splice_site	Splice site sequence
15	canonical	Indicates whether the junction is canonical or not. The set of splice sites that are considered by SQANTI as canonical are GTAG,GCAG,ATAC. Canonical junction sequences can be modified by --sites option.
16	RTS_junction	Logical, indicating the detection of hallmarks of RT switching
17	indel_near_junc	Logical, indicating the existence of indels around the junction
18	samples_with_cov	Number of samples that support the splice junction
19	total_coverage	Short-read coverage sum across input samples
20	coverage_per_sample	Average short-read coverage across input sample

## Sheet: Supplemental Table 3
PLOT NUMBER	PLOT NAME
1	Distribution of isoforms per gene
2	Distribution of isoforms per gene
3	Distribution of mono/multi exon transcripts
4	Number of FL reads per Gene by type of gene annotation
5	Gene expression by type of gene annotation
6	Adenine enrichment downstream TTS (intra primming)
7	Adenine enrichment downstream TTS (intra primming) by coding potential
8	Isoform distribution across structural categories
9	Transcript length distribution by structural classification
10	Exon number distribution by structural classification
11	Number of FL reads per transcript by structural category
12	Transcript expression by structural category
13	Adenine enrichment downstream TTS (intra primming) by structural category
14	Length distribution of matched reference transcripts,
15	Exon number distribution of matched reference transcripts,
16	Gene expression levels between NNC and not NNC containing genes
17	Gene expression level in NNC/FSM containing genes
18	Transcript expression level in NNC/FSM containing genes
19	Distribution of transcripts by splice junction category
20	Distribution of SJ by splice junction category
21	Distribution of splice junction distante to TSS
22	Splice junction distance to TSS across junction type
23	Splice junction distance to TSS across junction type 2
24	RT-switching by splice junction category
25	RT-switching by splice junction category (unique junctions)
26	Splice junctions without short-read coverage
27	Splice junctions without short-read coverage (unique junctions)
28	Relative Coverage of junctions
29	Distance distribution from sequenced to annotated TTS (%)
30	Distance distribution from sequenced to annotated TTS
31	Distance distribution from sequenced to annotated TSS (%)
32	Distance distribution from sequenced to annotated TSS
33	Quality control attributes across structural categories
34	Quality control attributes across structural categories

## Sheet: Supplemental Table 4
RT-PCR validation of ToFU transcripts
Isoform	Gene	SQANTI Class	PCR conditions			Validation	Forward Primer	Reverse Primer	Annealing Temperature	Amplicon Size	Amplification Sample
			Clontech oligodT cDNA	Random hexamers
				42 ºC	50 ºC
PB.1035.1	Dhrs7b	FSM	POSITIVE	Not done	Not done	Yes	TCTCCGTCCTTTAGGAAAGGT	CTGTGAACTCTGACCCACTCT	60 ºC	1187	OLD-1
PB.1035.2	Dhrs7b	FSM	POSITIVE	Not done	Not done	Yes	GGTAAAGGCTAGGGATGTTGC	CTGTGAACTCTGACCCACTCT	60 ºC	1203	OLD-1
PB.1065.1	Myh10	NNC	POSITIVE	NEGATIVE	NEGATIVE	No	ACTCAAGCTGACTGGACAGCAG	TAGGGTGTCCTCCAGCTCTGT	64 ºC	847	NSC-2
PB.1072.1	Cyb5d1	FSM	POSITIVE	POSITIVE	POSITIVE	Yes	GATGTTGGAGTTTGCCTCTTTC	TTAGCCTTCCCTGCCTTTGT	63 ºC	804	OLD-2
PB.1414.4	Tmc6	FSM	POSITIVE	Not done	Not done	Yes	ACGGGAGACGAAGGGCAGA	CTGAACACCCACGAGGAAGG	65 ºc	662	OLD-2
PB.1591.1	Gm32151,Tmx1	Fusion	POSITIVE	POSITIVE	POSITIVE	Yes	CCCTTTCTGCATCCCTGGTAG	TACTGTTGCTGTGGTTTGCG	63 ºC	801	OLD-2
PB.1614.1	Mthfd1	NIC	POSITIVE	POSITIVE	POSITIVE	Yes	GGGAAACTGGTTTCTGCGTTG	ACCAGGGACAGGCGTGATAA	63 ºC	707	OLD-2 and NSC-2
PB.1614.2	Mthfd1	FSM	POSITIVE	Not done	Not done	Yes	GGTGGCAGACTAGCAAAGGG	ACCAGGGACAGGCGTGATAA	63 ºC	839	OLD-2 and NSC-2
PB.1668.1	0610007P14Rik	FSM	POSITIVE	Not done	Not done	Yes	GCAGTAGTACTGGATCGTCAG	TACTGGTTCTGCCTCTAGGT	55 ºC	448	NSC-2
PB.1668.2	0610007P14Rik	NNC	POSITIVE	NEGATIVE	NEGATIVE	No	AAATGGGAACTTTGCTGCAC	AGCTGCGGCTTCACAGTTAT	60 ºC	942	NSC-2
PB.1709.1	Bdkrb2	NIC	POSITIVE	NEGATIVE	Not done	No	CGCTTGAGAAAAGTGCGCTG	TCTCGTTGTTCCTCAGCACC	68 ºC	1194	OLD-2
PB.1709.2	Bdkrb2	FSM	POSITIVE	Not done	Not done	Yes	AACACAGAACCGGCTCGCTT	TCTCGTTGTTCCTCAGCACC	64 ªC	839	NSC-1
PB.1848.1	Fam120a	NNC	NEGATIVE	NEGATIVE	NEGATIVE	No	TGAGGTGTTGAGAGTGGCTG	CACCCGTGCTCCCATTAAGT	63 ºC	826	NSC-2
PB.1977.1	Wdr41	NNC	NEGATIVE	Not done	Not done	No	CCAACGAGACTTCTGTTTTCC	ATCCCATTCCGGCAATTCTT	61 ºC	647	OLD-2
PB.2.1	Lypla1	FSM	POSITIVE	Not done	Not done	Yes	ATGTGCGGCAACAACATGTC	ATGAGCTGTGCATCATGCCT	63 ºC	630	NSC-2
PB.2.2	Lypla1	FSM	POSITIVE	Not done	Not done	Yes	ATGTGCGGCAACAACATGTC	ATGAGCTGTGCATCATGCCT	63 ºC	529	NSC-2
PB.2.3	Lypla1	NIC	POSITIVE	POSITIVE	POSITIVE	Yes	ATGTGCGGCAACAACATGTC	CTCGGCACTTACACCTGTCC	63 ºC	840	NSC-2
PB.2037.1	Nnt	NNC	NEGATIVE	NEGATIVE	NEGATIVE	No	CATCCACCTTAAGGGAACTGG	GGTAAAGCTAGGGTCAGCCAT	61 ºC	891	OLD-2
PB.2474.1	St13	FSM	POSITIVE	Not done	Not done	Yes	CAGGGAGGTGAGTGGATGAC	AGAACCGTGCAAAGTTCCAA	63 ºC	1098	OLD-2
PB.2474.2	St13	NNC	NEGATIVE	Not done	Not done	No	CAGGGAGGTGAGTGGATGAC	AGAACCGTGCAAAGTTCCAA	63 ºC	761	OLD-2
PB.3175.1	Slc30a6	NIC	POSITIVE	POSITIVE	Not done	Yes	GACTTCTCAGAGCGTCTTCCG	ATTTGTTCGTTCGCATCTCG	65 ºC	771	OLD-2
PB.3205.2	Rhoq	NNC	POSITIVE	NEGATIVE	Not done	No	AACAACAACCGTCAGCCACT	CGCCACTCTGGATCTACTGG	64 ºC	958	NSC-2
PB.3511.1	Pla2g16	FSM	POSITIVE	Not done	Not done	Yes	TTCTGGGACCCAAGCAAAGG	ACTGGGCAGTCATTCAGCTC	63 ºC	575	NSC-1
PB.3520.2	1810009A15Rik	NNC	POSITIVE	POSITIVE	POSITIVE	Yes	TACCAGGTTTCAGAGCATCCCAG	GAAGTGTCTCCACCCACACG	64 ªC	522	NSC-1
PB.3619.1	Sorbs1	NIC	POSITIVE	POSITIVE	POSITIVE	Yes	GGAATTGGAGTTTGGGAGACC	AGATCAGGTCCTGCGCTCAA	61 ºC	851	OLD-2
PB.3654.1	Mgea5	NNC	NEGATIVE	NEGATIVE	NEGATIVE	No	TCGTTGGAGCAGTCGGTAGC	AGTGGCAAGGGTGTGTATGG	63 ºC	815	NSC-2
PB.3658.3	Nolc1	NNC	POSITIVE	POSITIVE	POSITIVE	Yes	AGAAAGCTCTTCAGACAGCTCG	ACGCCCTTCTTTCTCCCTTTCT	63 ºC	729	NSC-1
PB.3813.4	Ppp2r4	NNC	POSITIVE	POSITIVE	Not done	Yes	AGAGGCAGGAACGCAGCGTC	CAGGCCAGCACTTCCCTCAT	70 ºC	1164	NSC-2
PB.3890.4	Gpd2	NIC	POSITIVE	POSITIVE	POSITIVE	Yes	GTGTCTCAGCGTTCGGCTTC	CGTGCATCGTTGTGTTGTCC	65 ªC	878	NSC-2
PB.3890.5	Gpd2	NIC	NEGATIVE	NEGATIVE	NEGATIVE	No	GTGTCTCAGCGTTCGGCTTC	CGTGCATCGTTGTGTTGTCC	65 ªC	1218	NSC-2
PB.3943.1	Nckap1	NNC	NEGATIVE	Not done	Not done	No	CACACCTAGCGGAGGAGC	GAGACTCAGCAACTGGGCAT	61 ºC	752	NSC-2
PB.4131.1	Rassf2	FSM	POSITIVE	Not done	Not done	Yes	AGCTGTGTTGGGGAATTCAGA	TTGCCGAATCATTAGCCGGA	64 ºC	1028	NSC-2
PB.4162.2	Xrn2	NNC	POSITIVE	NEGATIVE	Not done	No	GCAAGGTGTTGCTCTATTGC	CTCTGGGATATCCCTGAAATAC	62 ºC	881	NSC-2
PB.4207.4	Trp53inp2	NNC	NEGATIVE	NEGATIVE	NEGATIVE	No	GCCTCTCATTTGTTTTTCCTTT	AGCATCATGCCTCCTCATTCT	60 ºC	895	OLD-2
PB.4343.1	Uckl1	FSM	POSITIVE	Not done	Not done	Yes	AGGCCGAGCAGAATGAAACG	TGGCTAACTAACCTCTTCCAGC	63 ºC	839	OLD-2
PB.4640.2	Slc16a1	NNC	POSITIVE	NEGATIVE	Not done	No	TCGGTGTCCCACCAGATACT	ATGGACGGTCTGGCTACCAT	65 ºC	948	OLD-2
PB.466.2	Capn2	NNC	NEGATIVE	Not done	Not done	No	CCCTGGGTAAGTAGTGGGGT	TGTTGGTCTGCCCTGTTAGC	64 ºC	869	OLD-2
PB.467.1	Susd4	FSM	POSITIVE	POSITIVE	POSITIVE	Yes	CTGCATGCATGAGACCCACAGA	AGGAGGTAGTGGACAAACTTGGG	65 ºC	802	OLD-2
PB.4708.3	Ank2	NIC	POSITIVE	POSITIVE	POSITIVE	Yes	GCTGTCGGTACATGACCATGA	CCTACTCGAATGCGCTTGGT	63 ªC	829	NSC-2
PB.5108.3	AU040320	NNC	POSITIVE	POSITIVE	Not done	Yes	GCCAGCATTGTTAGCACTCG	CCTTCTTGCATTGCGGACAG	67 ºC	705	OLD-2
PB.5185.2	Hmgcl,Fuca1	Fusion	NEGATIVE	NEGATIVE	NEGATIVE	No	AACGCAACTGTTTACGCCAC	ACACCCAATTCCCTCCGTTC	62 ºC	1178	OLD-2
PB.5185.4	Hmgcl,Fuca1	Fusion	NEGATIVE	NEGATIVE	NEGATIVE	No	AACGCAACTGTTTACGCCAC	ACACCCAATTCCCTCCGTTC	62 ºC	1178	OLD-2
PB.5338.4	RP23-110C17.2	NNC	NEGATIVE	NEGATIVE	NEGATIVE	No	TTCCAGAAGAGAAGCTCCAAGCTC	GGTCCCTGTGGAATCGATACAGTCT	66 ºC	952	NSC-1
PB.5557.1	Pgam5	NNC	POSITIVE	NEGATIVE	NEGATIVE	No	TTTCCGGCAGGCGCTTCAG	TGGCTTCCAGTGAGAGACAGGT	67 ºC	463	NSC-2
PB.5609.5	Naa25	NNC	NEGATIVE	Not done	Not done	No	CGGTAATGATGAGGAAGGAAGC	TGTGGTACAAGCCAAGGAGC	62 ªC	1172	NSC-2
PB.5794.4	Ptprz1	NNC	POSITIVE	POSITIVE	Not done	Yes	GGACAGAAGTTCCCACTGGAG	GTTCCAACCTAGCGTCCCATC	65 ºC	868	NSC-2
PB.5874.1	Cycs	FSM	POSITIVE	Not done	Not done	Yes	AGTCCGAACGTTCGTGGTG	GTTGCCTCCTGGTGGTTAGC	63 ºC	828	NSC-2
PB.5874.2	Cycs	NNC	POSITIVE	NEGATIVE	NEGATIVE	No	TGCTGTTCCTTCAGGACTGG	GTTGCCTCCTGGTGGTTAGC	63 ºC	866	NSC-2
PB.6279.7	Gpi1	NIC	POSITIVE	POSITIVE	POSITIVE	Yes	TCCTGCTCCGTGTACCTCTC	AGGTGCCCGTACTTACATCC	60 ºC	850	OLD-2
PB.6380.2	Lrrc28	NIC	POSITIVE	POSITIVE	POSITIVE	Yes	GACAAGCCTGGACTTGTAGG	AGCAGCAGTAAGCCACGAAG	60 ºC	857	OLD-2
PB.6380.3	Lrrc28	NIC	NEGATIVE	NEGATIVE	NEGATIVE	No	GACAAGCCTGGACTTGTAGG	AGCAGCAGTAAGCCACGAAG	60 ºC	951	OLD-2
PB.6460.1	Spcs2	FSM	POSITIVE	Not done	Not done	Yes	AGACACGGAGGGAGACAAGAT	GGCTACAGCCATCAAAGGGA	63 ºC	877	NSC-1
PB.6465.2	Rab6a	NNC	NEGATIVE	Not done	Not done	No	GGCTTGGCTCGGAGTTGTA	CTGCGGTTTGCCATGTCTTG	67 ºC	1056	NSC-2
PB.650.3	Zwint	FSM	POSITIVE	Not done	Not done	Yes	TGCGACGAAAGAGGTTCTGG	TCAATGCTCTCGTTGCAGGA	64 ºC	844	NSC-2
PB.6901.1	Lonp2	FSM	POSITIVE	POSITIVE	POSITIVE	Yes	CTGCAGTTGCTAAATTGAGACG	ATGATGGCCAGAGTGGTGTG	62 ºC	733	OLD-2
PB.6901.3	Lonp2	NNC	POSITIVE	POSITIVE	POSITIVE	Yes	CTGCAGTTGCTAAATTGAGACG	ATGATGGCCAGAGTGGTGTG	62 ºC	1159	OLD-2
PB.6901.4	Lonp2	FSM	POSITIVE	POSITIVE	POSITIVE	Yes	CTGCAGTTGCTAAATTGAGACG	ATGATGGCCAGAGTGGTGTG	62 ºC	1159	OLD-2
PB.6920.1	Fam192a	NIC	POSITIVE	NEGATIVE	Not done	No	TCTTCCCCGAGTTCCAGAAA	CAGAACTGGCATCCAACCCT	66 ºC	1074	OLD-2
PB.707.9	Eef2	NNC	POSITIVE	POSITIVE	Not done	Yes	TATTGACCCACCGATGCCTG	AGGCCAGAACCAAAGCCTAC	67 ºC	719	OLD-2
PB.7145.1	Cnn1	FSM	POSITIVE	Not done	Not done	Yes	GAGGTCCTGCCTACGGCTTG	ACTCCGGGTTCAGGCAGTAC	64 ªC	810	OLD-2
PB.7227.1	Rbm7	FSM	POSITIVE	Not done	Not done	Yes	ACTGGAACAGCGCGGAGATG	TGATCCGCATGTGGAGAACC	65 ºc	622	OLD-2
PB.7227.2	Rbm7	FSM	POSITIVE	Not done	Not done	Yes	ACTGGAACAGCGCGGAGATG	TGATCCGCATGTGGAGAACC	65 ºc	517	OLD-2
PB.7427.1	Ryk	ISM	POSITIVE	POSITIVE	POSITIVE	Yes	CCTATCACCAGCTCCTCAGG	CTTAGGCCTCTCCTCAGGGT	62 ºC	894	NSC-2
PB.7617.3	Cul4b	NNC	POSITIVE	NEGATIVE	NEGATIVE	No	TTAAGGATCGGGTGGCCGAC	TTGCTTCACCATTCCGCTCT	66 ªC	1044	NSC-1
PB.7673.6	Gdi1	NNC	NEGATIVE	Not done	Not done	No	GCATCAAGTTGTACAGCGAG	TAGCTGTCTTCAGACACTCCAG	59 ªC	953	OLD-2
PB.7737.1	Pgk1	FSM	POSITIVE	Not done	Not done	Yes	TTGGACAAGCTGGACGTGAA	GCAACCCCTAGAAGTGGCTT	62 ºC	1077	OLD-2
PB.7737.2	Pgk1	NNC	NEGATIVE	Not done	Not done	No	TTGGACAAGCTGGACGTGAA	GCAACCCCTAGAAGTGGCTT	62 ºC	637	OLD-2
PB.7737.3	Pgk1	NNC	POSITIVE	POSITIVE	POSITIVE	Yes	ATTTTACAAGGCTCTGGTGGACT	GCAACCCCTAGAAGTGGCTT	60 ºC	1051	OLD-2
PB.7737.4	Pgk1	NNC	POSITIVE	NEGATIVE	NEGATIVE	No	TCTTGTAAGGTTCTGGGTGCAG	GCAACCCCTAGAAGTGGCTT	60 ºC	1142	OLD-2
PB.83.1	Col5a2	FSM	NEGATIVE	Not done	Not done	No	AGTTTTGGTAAGAATTCTCAAAG	TTCTCCCTTCATTCCAGGAT	55 ºC	850	NSC-2
PB.856.2	Nf2	NNC	NEGATIVE	NEGATIVE	Not done	No	TCAGCAGATGAAAGCCCAGG	AGCTACAGGCTCAAAGCAGG	64 ªC	647	NSC-2
XM_006495472	Lypla1	---	NEGATIVE	Not done	Not done	No	ATGTGCGGCAACAACATGTC	ATGAGCTGTGCATCATGCCT	63 ªC	599	NSC-2
XM_006508117	Spcs2	---	NEGATIVE	Not done	Not done	No	GCACTTCCGACCTCACAAGA	GGCTACAGCCATCAAAGGGA	64 ºC	934	NSC-1
XM_006510552	Rbm7	---	NEGATIVE	Not done	Not done	No	ACTGGAACAGCGCGGAGATG	TGATCCGCATGTGGAGAACC	65 ºc	426	OLD-2
XM_006515442	Bdkrb2	---	NEGATIVE	Not done	Not done	No	TCACCTGCCCATTGTCTGTC	TCTCGTTGTTCCTCAGCACC	64 ªC	851	NSC-1
XM_006526921	Pla2g16	---	NEGATIVE	Not done	Not done	No	TTCTGGGACCCAAGCAAAGG	ACTGGGCAGTCATTCAGCTC	63 ºC	813	NSC-1
XM_006532869	Dhrs7b	---	NEGATIVE	Not done	Not done	No	TACTCAACGGCAAAGGTGGC	CTGTGAACTCTGACCCACTCT	60 ºC	1298	OLD-1
XM_011242388	Cnn1	---	NEGATIVE	Not done	Not done	No	GAGGTCCTGCCTACGGCTTG	ACTCCGGGTTCAGGCAGTAC	63 ºC	690	NSC-1
XM_011242389	Cnn1	---	POSITIVE	Not done	Not done	Yes	AGGGCTGGGGCCAGCT	ACTCCGGGTTCAGGCAGTAC	63 ºC	783	NSC-1
XM_011243991	Bdkrb2	---	NEGATIVE	Not done	Not done	No	TCACCTGCCCATTGTCTGTC	TCTCGTTGTTCCTCAGCACC	64 ªC	1230	NSC-1
XM_011247220	Pla2g16	---	POSITIVE	Not done	Not done	Yes	AATACTGCCATGGCTGCTGG	ACTGGGCAGTCATTCAGCTC	63 ºC	531	NSC-1

## Sheet: Supplemental Table 5
Isoform	SQANTI Class	Validation	SQANTI Filter		NIC Class
PB.1065.1	NNC	No	NEG				SQANTI FILTER
PB.1668.2	NNC	No	NEG
PB.1848.1	NNC	No	NEG				NEG	POS
PB.1977.1	NNC	No	NEG		Validation	No	3	0
PB.2037.1	NNC	No	NEG			Yes	1	7
PB.2474.2	NNC	No	NEG
PB.3205.2	NNC	No	NEG
PB.3654.1	NNC	No	NEG
PB.1614.1	NIC	Yes	POS		NNC Class
PB.3813.4	NNC	Yes	NEG
PB.3943.1	NNC	No	NEG
PB.4162.2	NNC	No	NEG				SQANTI FILTER
PB.4207.4	NNC	No	NEG
PB.4640.2	NNC	No	NEG				NEG	POS
PB.466.2	NNC	No	NEG		Validation	No	22	1
PB.5108.3	NNC	Yes	NEG			Yes	5	1
PB.5338.4	NNC	No	NEG
PB.5557.1	NNC	No	NEG
PB.5609.5	NNC	No	NEG
PB.5794.4	NNC	Yes	NEG
PB.5874.2	NNC	No	POS
PB.6465.2	NNC	No	NEG
PB.6901.3	NNC	Yes	POS
PB.707.9	NNC	Yes	NEG
PB.7617.3	NNC	No	NEG
PB.7673.6	NNC	No	NEG
PB.7737.2	NNC	No	NEG
PB.7737.3	NNC	Yes	NEG
PB.7737.4	NNC	No	NEG
PB.856.2	NNC	No	NEG
PB.1709.1	NIC	No	NEG
PB.2.3	NIC	Yes	POS
PB.3175.1	NIC	Yes	NEG
PB.3619.1	NIC	Yes	POS
PB.3890.4	NIC	Yes	POS
PB.4708.3	NIC	Yes	POS
PB.6279.7	NIC	Yes	POS
PB.6380.2	NIC	Yes	POS
PB.6380.3	NIC	No	NEG
PB.6920.1	NIC	No	NEG
