# Supplementary material for: SQANTI: extensive characterization of long-read transcript sequences for quality control in full-length transcriptome identification and quantification
Source: HighWire-hosted journal article supplement (doi:10.1101/gr.222976.117), 2018-02-09
Supplement: Supplemental_SQANTI_Source_Code.zip [file classificationFile_info.xlsx]

## Sheet: classification output file
SQANTI descriptors at transcript level
Column	Feature Name	Description
1	isoform	Unique ID conferred by Pacbio to ToFU transcripts
2	chrom	Chromosome where the transcript aligns
3	strand	Strand to which the transcript belongs
4	length	Length of the transcript in nucleotides
5	exons	Number of exons
6	structural_category	Splice junction based classification of the transcript against a annotated reference transcriptome
7	associated_gene	Gene to which the transcript maps
8	associated_transcript	Transcript in the reference annotation which has the same splice pattern as the isoform. Only applicable to FSM, ISM and UTR3 Fragment transcripts.
9	ref_length	Length of the associated reference transcript in nts. Only applicable to FSM, ISM and UTR3 Fragment transcripts.
10	ref_exons	Number of exons of the associated reference transcript. Only applicable to FSM, ISM and UTR3 Fragment transcripts.
11	diff_to_TSS	Difference in nucleotides between the Transcription Start Site (TSS) of the associated reference transcript and the sequenced transcript. Only applicable to FSM, ISM and UTR3 Fragment transcripts.
12	diff_to_TTS	Difference in nucleotides between the Transcription Termination Site (TTS) of the associated reference transcript and the sequenced transcript. Only applicable to FSM, ISM and UTR3 Fragment transcripts.
13	subcategory	Type of subevent associated with the transcript. Applicable for ISM and novel transcripts.
14	RTS_stage	Detection of hallmarks of RT switching within at least one of the splice junctions of the sequenced transcript
15	all_canonical	Labelling of the type of splice junction in the transcript. If all the splice junctions of the transcript are canonical this field will be “canonical”. If there is at least one non canonical junction in the transcript will be labelled as non-canonical.
16	min_sample_cov	Lowest number of biological samples showing the presence of a splice junction within the transcript. Each time a splice junction within a transcript is covered by short reads of a different sample the value is augmented by 1. After mapping all available samples, the number of samples supporting each junction is computed and the minumun value of all transcript junctions is taken as min_sample_cov …
17	min_cov	Lowest number of short reads supporting the presence of a splice junction within the transcript. The number of short reads mapping to each splice junction are obtained for each available sample. After mapping all the available samples, the total number of short reads mapped per junction is computed and the lowest value is taken as minCov value
18	min_cov_pos	Position in nts relative to the TSS of the splice junction with the minCov value. If two splice junctions show the same minCov, the minCovPos selected is the one closest to the TSS.
19	sd_cov	Standard Deviation of the splice junction short read coverage per transcript
20	FL	Number of Full Length reads per transcript
21	n_indels	Number of indels in the ToFU transcript before genome-based correction
22	n_indels_junc	Number of junctions with indels around the splice junction of the ToFU transcript before correction
23	bite	The transcript has at least one junction labelled as bite
24	iso_exp	Expression of the transcript in TPMs calculated by short reads
25	gene_exp	Sum of all isoExp values of transcripts belonging to the same gene.
26	ratio_exp	Ratio between the isoExp and the geneExp
27	FSM_class	This feature classifies the transcript according to the expression of other isoforms in the gene to which the transcript belongs. Transcripts belonging to genes that only express one isoform are classified as A. Transcripts belonging to genes that express more than one isoform but none is a FSM are classified as B. Transcripts belonging to genes which express more than one isoform and other isofo…
28	coding	Logical indicating if the transcript is predicted to have an ORF by GMST
29	ORF_length	Length in aminoacids of the Open RF predicted by GMST
30	CDS_length	Length in nts of the CDS predicted by GMST
31	CDS_start	Position in nucleotides relative to the TSS of the start codon
32	CDS_end	Position in nucleotides relative to the TSS of the stop codon
33	perc_A_downstream_TTS	Percentage of adenines in a window of genomic DNA inmmediately downstream the TTS. The deffault parameter for window size is 20 nucleotides
