# Supplementary material for: SQANTI: extensive characterization of long-read transcript sequences for quality control in full-length transcriptome identification and quantification
Source: HighWire-hosted journal article supplement (doi:10.1101/gr.222976.117), 2018-02-09
Supplement: Supplemental_SQANTI_Source_Code.zip [file junctionFile_info.xlsx]

## Sheet: junction output file
SQANTI decriptors at junction level
Column	Feature Name	Description
1	isoform	Unique ID conferred by Pacbio to ToFU transcripts.
2	chrom	Chromosome where the transcript aligns
3	strand	Strand to which the transcript belongs
4	junction_number	Position order, starting from the 5' end, of the junction in the transcript
5	genomic_start_coord	Start coordinate position of the junction in the genome
6	genomic_end_coord	End coordinate position of the junction in the genome
7	transcript_coord	Coordinate of the junction inside the transcript
8	junction_category	Type of junction. "Known" if both the acceptor and the donor sites are annotated in the provided reference annotation file and "Novel" otherwise.
9	start_site_category	"Known" or "novel" according to reference annotated splice sites
10	end_site_category	"Known" or "novel" according to reference annotated splice sites
11	diff_to_Ref_start_site	Nearest annotated splice site in the genome
12	diff_to_Ref_end_site	Nearest annotated splice site in the genome
13	bite_junction	Applies only to novel splice junctions. If the novel intron partially overlaps annotated exons the bite value is TRUE, otherwise it is FALSE.
14	splice_site	Splice site sequence
15	canonical	Indicates whether the junction is canonical or not. The set of splice sites that are considered by SQANTI as canonical are GTAG,GCAG,ATAC. Canonical junction sequences can be modified by --sites option.
16	RTS_junction	Logical, indicating the detection of hallmarks of RT switching
17	indel_near_junc	Logical, indicating the existence of indels around the junction
18	samples_with_cov	Number of samples that support the splice junction
19	total_coverage	Short-read coverage sum across input samples
20	coverage_per_sample	Average short-read coverage across input sample
